# Supplementary material
Source: PubMed Central journal article supplement (PMC6310146)
Supplement: NIHMS999274-supplement-Supp_Table.pdf [file NIHMS999274-supplement-Supp_Table.pdf]

**Supplementary Table 1.** *Model fit indices for 1- and 2- factor item response theory models and 2-6 class latent class models of conduct disorder symptoms.*

| Model              | Bayes Information Criterion | Akaike's Information Criterion |
|--------------------|-----------------------------|--------------------------------|
| IRT model          |                             |                                |
| 1-factor           | 67835.0                     | 67627.7                        |
| 2-factor           | 68083.0                     | 67883.7                        |
| Latent class model |                             |                                |
| 2 Classes          | 68338.9                     | 68123.6                        |
| 3 Classes          | 67882.9                     | 67555.9                        |
| 4 Classes          | 67485.2                     | 67046.5                        |
| 5 Classes          | <b>67437.3</b>              | 66887.0                        |
| 6 Classes          | 67459.5                     | <b>66797.5</b>                 |
